# Supplementary material for: Vertical Distribution of Heat and Sodium Fluxes in the Mesopause Region Measured by Sodium Lidar Over Hainan, China (109° E,19° N)
Source: Copernicus journal article supplement (doi:10.5194/egusphere-2025-4803), 2025-10-09
Supplement: Supplementary file 1 [file 1 Read me.docx]

1. Folder naming rules: 24001 represents the first day of 2024, which is January 1, 2024, and so on.

2. “Denint24048_65_nw2sg2nFnC”、“Tint24048_65_nw2sg2nFnC” and “Vint24048_65_nw2sg2nFnC” represents the density of sodium atoms、temperature and the vertical wind on 48th day of 2024, respectively.

3. The height resolution of 2km and time resolution of 30 min.
